# Supplementary material for: Detection Accuracy and Latency of Colorectal Lesions with Computer-Aided Detection System Based on Low-Bias Evaluation
Source: MDPI journal article supplement (doi:10.3390/diagnostics11101922), 2021-10-17
Supplement: s1 [file s1]

## Supplementary Materials

Table S1

Latency of lesion detection using the computer-aided detection system in lesion-based analysis

| Case No. | Polyp No. | Morphology | Size (mm) | Pathological diagnosis | Detection time (sec) |
|----------|-----------|------------|-----------|------------------------|----------------------|
| 1        | 1         | 0-Is       | 3         | Adenoma                | 1.6                  |
| 1        | 2         | 0-Is       | 4         | Adenoma                | 2.13                 |
| 1        | 3         | 0-Is       | 5         | Adenoma                | 1.93                 |
| 1        | 4         | 0-Is       | 5         | Adenoma                | 1.63                 |
| 1        | 5         | 0-Is       | 10        | Adenoma                | 0.5                  |
| 2        | 1         | 0-Is       | 6         | Adenoma                | 0.3                  |
| 2        | 2         | 0-Is       | 5         | Adenoma                | 1.53                 |
| 3        | 1         | 0- II a    | 12        | Adenoma                | 1.43                 |
| 3        | 2         | 0-Is       | 3         | Adenoma                | 2.67                 |
| 4        | 1         | 0-Is       | 10        | Adenoma                | 0.3                  |
| 5        | 1         | 0-Is       | 6         | Adenoma                | 0.13                 |
| 5        | 2         | 0-Is       | 6         | Adenoma                | 0.27                 |
| 6        | 1         | 0-Is       | 3         | Adenoma                | 0.4                  |
| 6        | 2         | 0-Is       | 4         | Adenoma                | 1.43                 |
| 6        | 3         | 0-Is       | 2         | Adenoma                | 0.9                  |
| 6        | 4         | 0-Is       | 5         | Adenoma                | 0.23                 |
| 6        | 5         | 0-Is       | 6         | Adenoma                | 0.67                 |
| 7        | 1         | 0-Is       | 5         | Adenoma                | 0.27                 |
| 7        | 2         | 0-Is       | 4         | Adenoma                | 1.67                 |

|           |   |         |    |                    |      |
|-----------|---|---------|----|--------------------|------|
| <b>7</b>  | 3 | 0-Is    | 4  | Adenoma            | 0.6  |
| <b>8</b>  | 1 | 0- II a | 2  | Adenoma            | 0.83 |
| <b>8</b>  | 2 | 0- II a | 8  | Adenoma            | 0.33 |
| <b>9</b>  | 1 | 0-Is    | 5  | Adenoma            | 0.67 |
| <b>9</b>  | 2 | 0- II a | 5  | Hyperplastic polyp | 0.57 |
| <b>9</b>  | 3 | 0-Is    | 5  | Adenoma            | 1.63 |
| <b>9</b>  | 4 | 0- II a | 5  | Adenoma            | 0.17 |
| <b>10</b> | 1 | 0-Is    | 6  | Adenoma            | 1.93 |
| <b>10</b> | 2 | 0-Is    | 20 | Adenoma            | 4.53 |
| <b>10</b> | 3 | 0-Is    | 15 | Adenoma            | 0.2  |
| <b>10</b> | 4 | 0-Is    | 3  | Adenoma            | 0.43 |
| <b>10</b> | 5 | 0- Ip   | 12 | Adenoma            | 0.2  |
| <b>10</b> | 6 | 0-Is    | 3  | Adenoma            | 0.2  |
| <b>10</b> | 7 | 0-Is    | 5  | Adenoma            | 0.37 |
| <b>10</b> | 8 | 0-Is    | 15 | Adenoma            | 1.17 |
| <b>11</b> | 1 | 0-Is    | 3  | Adenoma            | 1.67 |
| <b>11</b> | 2 | 0-Is    | 2  | Adenoma            | 1.1  |
| <b>11</b> | 3 | 0-Is    | 7  | Adenoma            | 0.83 |
| <b>11</b> | 4 | 0-Is    | 6  | Hyperplastic polyp | 1.1  |
| <b>11</b> | 5 | 0-Is    | 4  | Adenoma            | 0.37 |
| <b>11</b> | 6 | 0-Is    | 4  | Hyperplastic polyp | 0.2  |
| <b>12</b> | 1 | 0- II a | 8  | Adenoma            | 3.4  |
| <b>13</b> | 1 | 0-Is    | 6  | Adenoma            | 1.53 |
| <b>13</b> | 2 | 0-Is    | 5  | Adenoma            | 3.43 |
| <b>14</b> | 1 | 0- II a | 5  | Adenoma            | 0.53 |

|           |   |         |   |                    |                 |
|-----------|---|---------|---|--------------------|-----------------|
| <b>14</b> | 2 | 0-Is    | 3 | Adenoma            | Not<br>analyzed |
| <b>14</b> | 3 | 0- II a | 4 | Adenoma            | 0.6             |
| <b>14</b> | 4 | 0- II a | 5 | Adenoma            | 2.37            |
| <b>14</b> | 5 | 0-Is    | 3 | Adenoma            | 2.27            |
| <b>14</b> | 6 | 0-Is    | 4 | Adenoma            | 0.2             |
| <b>14</b> | 7 | 0-Is    | 6 | Adenoma            | 0.67            |
| <b>14</b> | 8 | 0-Is    | 8 | Adenoma            | 1.87            |
| <b>15</b> | 1 | 0-Is    | 2 | Adenoma            | 1.5             |
| <b>15</b> | 2 | 0-Is    | 5 | Adenoma            | 0.6             |
| <b>15</b> | 3 | 0- II a | 3 | Hyperplastic polyp | 3.67            |
| <b>15</b> | 4 | 0-Is    | 6 | Adenoma            | 4.33            |
| <b>15</b> | 5 | 0-Is    | 2 | Adenoma            | 0.17            |
| <b>16</b> | 1 | 0-Is    | 5 | Adenoma            | 1.6             |
| <b>17</b> | 1 | 0-Is    | 3 | Adenoma            | 0.67            |
| <b>17</b> | 2 | 0-Is    | 7 | Adenoma            | 0.17            |
| <b>18</b> | 1 | 0- II a | 2 | Adenoma            | 1.93            |
| <b>18</b> | 2 | 0- II a | 6 | Adenoma            | 0.53            |
| <b>18</b> | 3 | 0-Is    | 2 | Adenoma            | 0.53            |
| <b>19</b> | 1 | 0-Is    | 7 | Adenoma            | 0.13            |
| <b>19</b> | 2 | 0-Is    | 4 | Adenoma            | 0.57            |
| <b>19</b> | 3 | 0-Is    | 3 | Adenoma            | 0.77            |
| <b>19</b> | 4 | 0-Is    | 4 | Adenoma            | 0.27            |
| <b>19</b> | 5 | 0-Is    | 5 | Adenoma            | 2.63            |
| <b>20</b> | 1 | 0-Is    | 3 | Adenoma            | 0.43            |

|    |   |      |   |                    |     |
|----|---|------|---|--------------------|-----|
| 20 | 2 | 0-Is | 3 | Hyperplastic polyp | 0.9 |
|----|---|------|---|--------------------|-----|
